# Supplementary material for: Interpretable Machine Learning for Early Prediction of Prognosis in Sepsis: A Discovery and Validation Study
Source: PubMed Central journal article supplement — Infect Dis Ther. 2022 Apr 10;11(3):1117–32. doi: 10.1007/s40121-022-00628-6 (PMC9124279; doi:10.1007/s40121-022-00628-6), 2022-04-10
Supplement: 40121_2022_628_MOESM1_ESM.pdf [file 40121_2022_628_MOESM1_ESM.pdf]

## Supplementary Material

### Interpretable machine learning for early prediction of prognosis in sepsis: a discovery and validation study

Chang Hu, MD1,2\*, Lu Li, MD1,2\*, Weipeng Huang, MD1,2, Tong Wu, MD1,2, Qiancheng Xu, MD1,2, Juan Liu, PhD3#, Bo Hu, MD1,2#

1 Department of Critical Care Medicine, Zhongnan Hospital of Wuhan University, Wuhan 430071, Hubei, China

2 Clinical Research Center of Hubei Critical Care Medicine, Wuhan 430071, Hubei, China

3 School of Computer Science, Wuhan University, Wuhan 430072, Hubei, China

Email addresses: huchang@whu.edu.cn (Chang Hu), lulu189vip@163.com (Lu Li), huang7@whu.edu.cn (Weipeng Huang), annie\_wutong@foxmail.com (Tong Wu), qianchengxu@whu.edu.cn (Qiancheng Xu), liujuan@whu.edu.cn (Juan Liu), hobbyer1979@163.com (Bo Hu)

\* Chang Hu and Lu Li contributed equally and share the first authorship

#Corresponding Author:

Correspondence to: Bo Hu, MD; Zhongnan Hospital of Wuhan University; Wuhan 430071, Hubei, China; Email: hobbyer1979@163.com

And also correspondence to: Juan Liu, PhD; School of Computer Science, Wuhan University, Wuhan 430072, Hubei, China; Email: [liujuan@whu.edu.cn](mailto:liujuan@whu.edu.cn)

### Supplementary Tables and Figures cited in main text

- Table S1: All extracted variables in MIMIC-IV database (N=57).
- Table S2: Clinical features used for developing the models (N=25).
- Figure S1. Diagnostic criteria for sepsis.
- Figure S2. Study flowchart.
- Figure S3. Percentages of missing data for all included variables.
- Figure S4. Feature selection using the LASSO regression model.
- Figure S5. Calibration curve for in-hospital mortality for validation cohort in XGBoost.



**Table S1. All extracted variables in MIMIC-IV database (N=57).**

|                                     |                                        |
|-------------------------------------|----------------------------------------|
| Age                                 | <b>Demographic characteristics (4)</b> |
| Gender                              |                                        |
| Body weight                         |                                        |
| Height                              |                                        |
| Hypertension                        | <b>Medical history (9)</b>             |
| Diabetes                            |                                        |
| Congestive heart failure            |                                        |
| Cerebrovascular disease             |                                        |
| Chronic pulmonary disease           |                                        |
| Liver disease                       |                                        |
| Renal disease                       |                                        |
| Tumor                               |                                        |
| Acquired immune deficiency syndrome |                                        |
| Heart rate                          | <b>Vital signs (7)</b>                 |
| Systolic blood pressure             |                                        |
| Diastolic blood pressure            |                                        |
| Mean artery pressure                |                                        |
| Respiratory rate                    |                                        |
| Body temperature                    |                                        |
| SPO <sub>2</sub>                    |                                        |
| Blood glucose                       | <b>Laboratory findings (32)</b>        |
| Lactate                             |                                        |
| pH                                  |                                        |
| PCO <sub>2</sub>                    |                                        |
| PO <sub>2</sub>                     |                                        |
| Base excess                         |                                        |
| White blood cell                    |                                        |
| Anion gap                           |                                        |
| Bicarbonate                         |                                        |
| Blood urea nitrogen                 |                                        |
| Serum calcium                       |                                        |
| Serum chloride                      |                                        |
| Serum creatinine                    |                                        |
| Serum sodium                        |                                        |
| Serum potassium                     |                                        |
| Serum fibrinogen                    |                                        |
| International normalized ratio      |                                        |
| Prothrombin time                    |                                        |
| Partial thromboplastin time         |                                        |
| Alanine aminotransferase            |                                        |
| Alkaline phosphatase                |                                        |

|                            |                                       |
|----------------------------|---------------------------------------|
| Aspartate aminotransferase |                                       |
| Total bilirubin            |                                       |
| Amylase                    |                                       |
| Creative phosphokinase     |                                       |
| Creatine kinase MB         |                                       |
| Lactate dehydrogenase      |                                       |
| Pao2/Fio2 ratio            |                                       |
| Hematocrit                 |                                       |
| Hemoglobin                 |                                       |
| Platelets                  |                                       |
| Albumin                    |                                       |
| Antibiotic                 |                                       |
| Ventilation                |                                       |
| Vasopressor                |                                       |
| Urine output               | <b>Urine (1)</b>                      |
| GCS                        | <b>Severity of illness scores (1)</b> |

GCS, Glasgow Coma Scale

**Table S2. Clinical features used for developing the models (N=25).**

|                                |                                        |
|--------------------------------|----------------------------------------|
| Age                            | <b>Demographic characteristics (3)</b> |
| Body weight                    |                                        |
| Height                         |                                        |
| Hypertension                   | <b>Medical history (4)</b>             |
| Cerebrovascular disease        |                                        |
| Liver disease                  |                                        |
| Tumor                          |                                        |
| Heart rate                     | <b>Vital signs (5)</b>                 |
| Systolic blood pressure        |                                        |
| Respiratory rate               |                                        |
| Body temperature               |                                        |
| SPO <sub>2</sub>               |                                        |
| Lactate                        | <b>Laboratory findings (9)</b>         |
| pH                             |                                        |
| PO <sub>2</sub>                |                                        |
| Hematocrit                     |                                        |
| Anion gap                      |                                        |
| Blood urea nitrogen            |                                        |
| International normalized ratio |                                        |
| Prothrombin time               |                                        |
| Partial thromboplastin time    |                                        |
| Ventilation                    | <b>Medical treatments (2)</b>          |
| Vasopressor                    |                                        |
| Urine output                   | <b>Urine (1)</b>                       |
| GCS                            | <b>Severity of illness scores (1)</b>  |

GCS, Glasgow Coma Scale

**Figure S1. Diagnostic criteria for sepsis.**

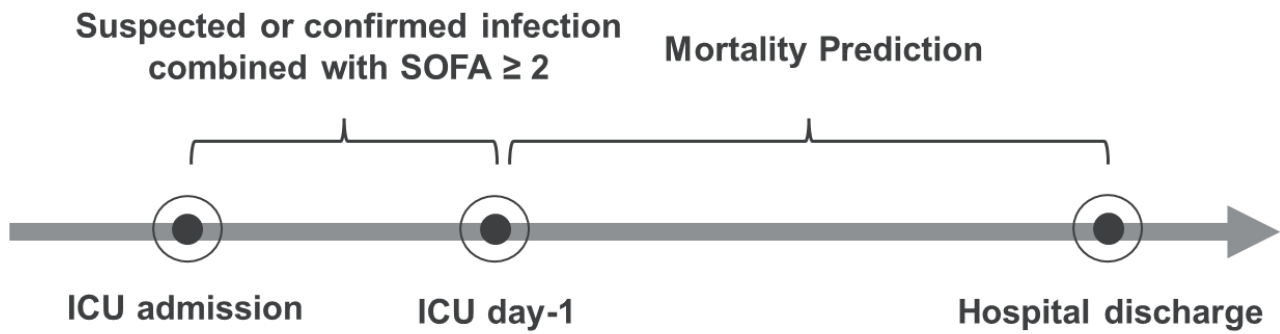

Patients were diagnosed with sepsis using the Sepsis-3 criteria in the first 24 hours of ICU admission: (i) with confirmed or suspected infection and (ii) with 2 or more SOFA points. Abbreviations: SOFA, Sequential Organ Failure Assessment; ICU, intensive care unit.

**Figure S2. Study flowchart.**

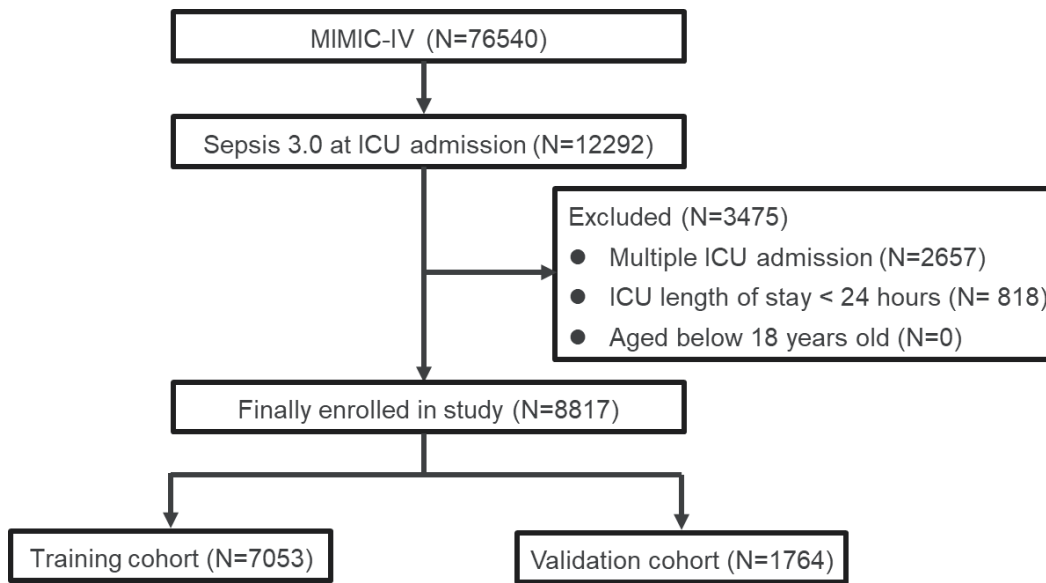

Figure S3. Percentages of missing data for all included variables.

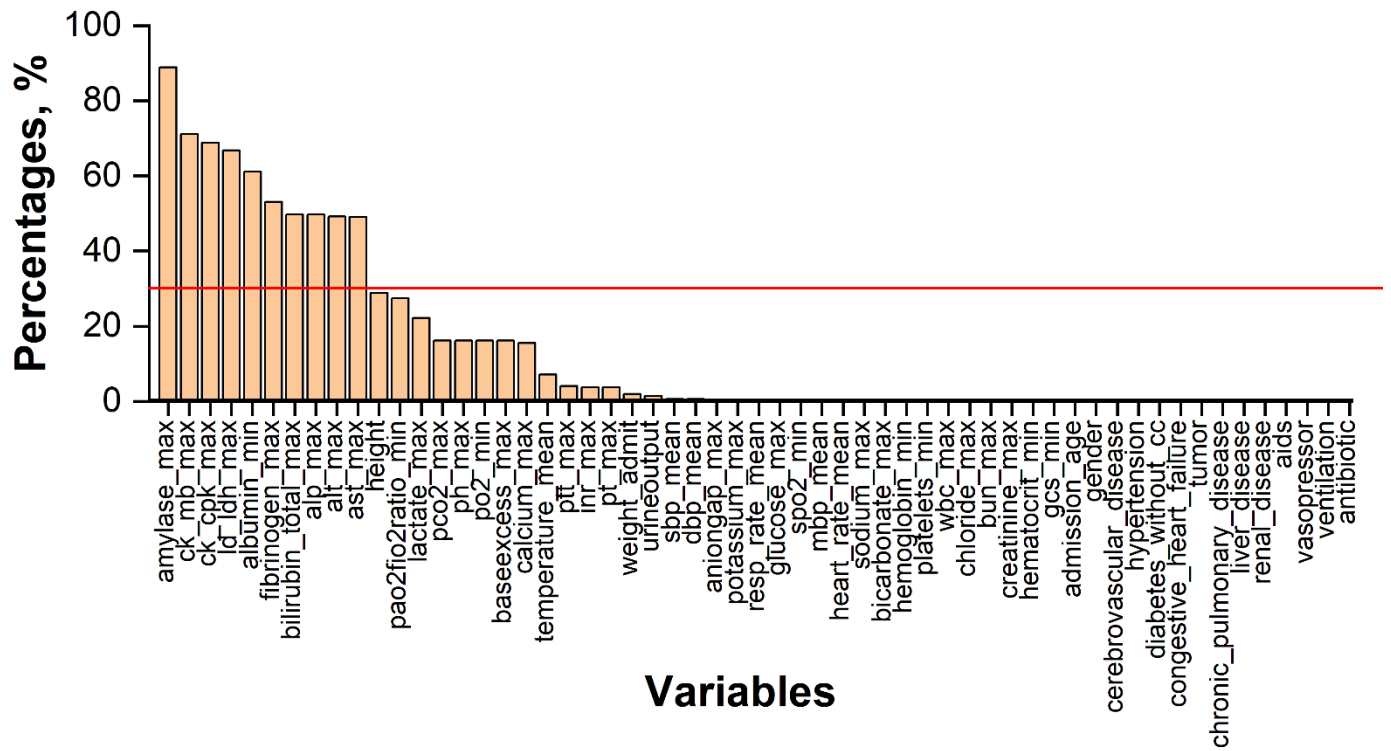

Variables with above 30% missing values were removed from further analysis.



**Figure S4. Feature selection using the LASSO regression model.**

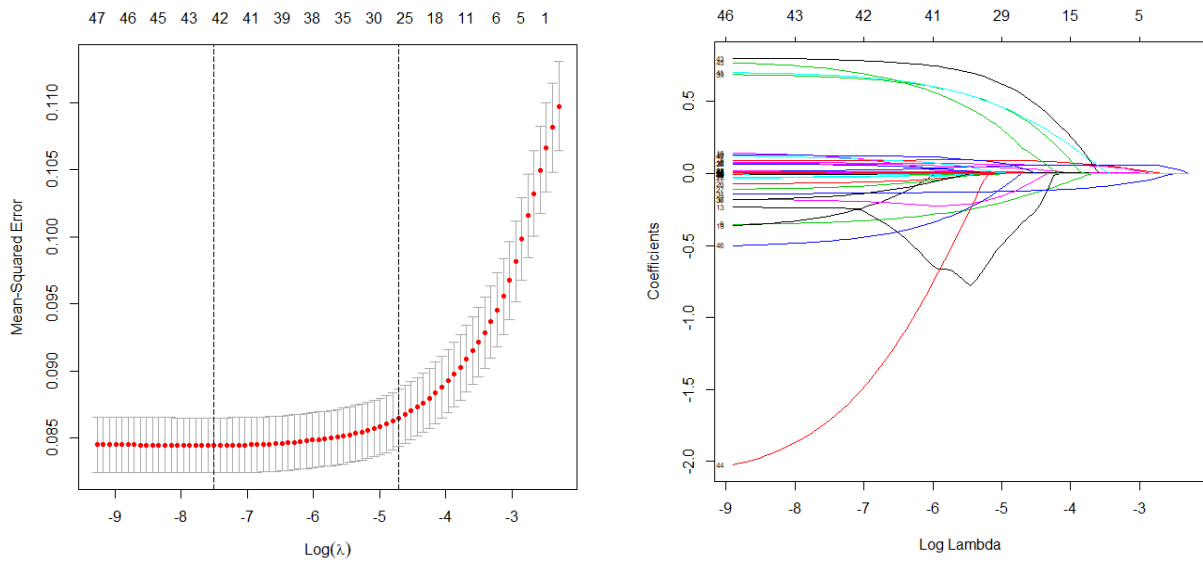

(A) LASSO coefficient profiles of the 47 baseline features.

(B) Tuning parameter ( $\lambda$ ) selection in the LASSO model used 5-fold cross-validation via minimum criteria.

LASSO, least absolute shrinkage and selection operator.

Figure S5. Calibration curve for in-hospital mortality for validation cohort in XGBoost.

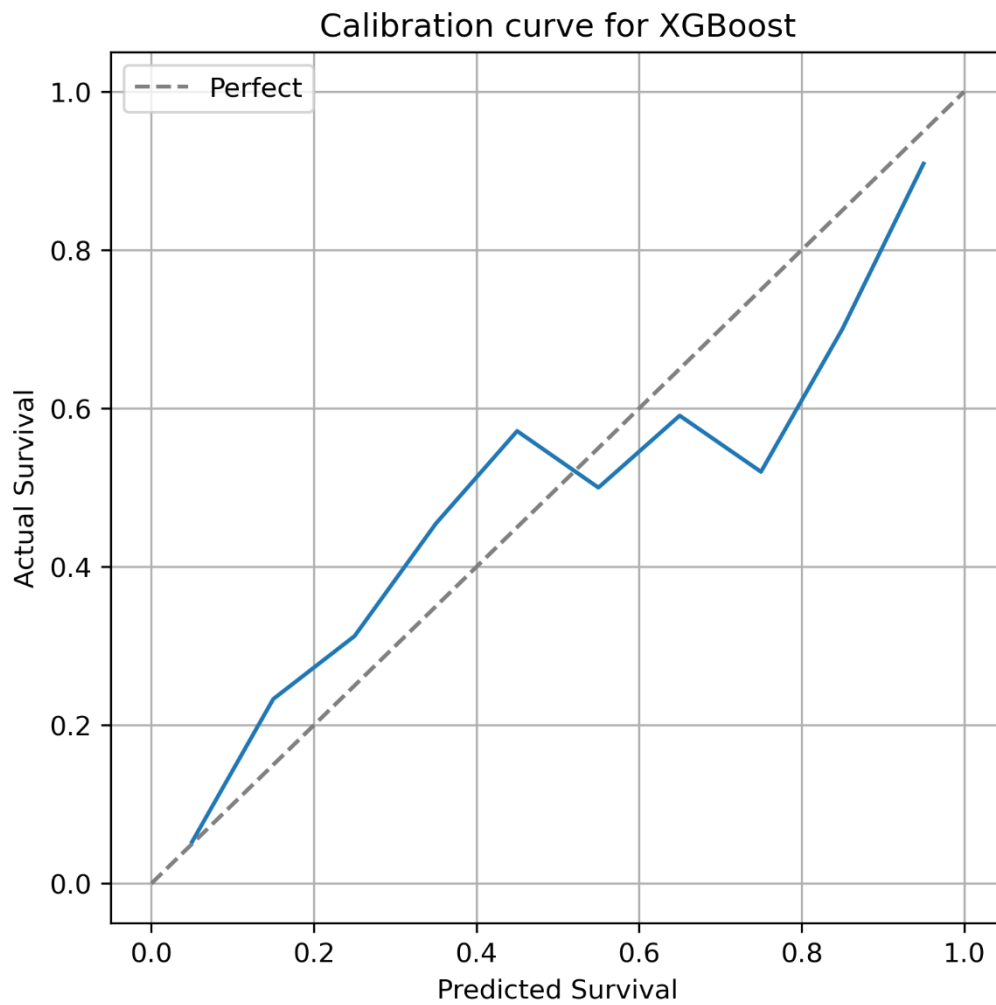

The dotted line indicates the ideal reference line where predicted probabilities would match the observed survival rates. The blue line represents the performance of the XGBoost. The closer the blue line is to the dotted line, the more accurately the model predicts in-hospital mortality.

XGBoost, eXtreme Gradient Boosting.
